# Supplementary material for: The effect of carbon nanotubes/NiFe2O4on the thermal stability, combustion behavior and mechanical properties of unsaturated polyester resin
Source: Royal Society of Chemistry journal article supplement (doi:10.1039/c6ra15246e), 2016-01-01
Supplement: c6ra15246e1.pdf [file c6ra15246e1.pdf]

Electronic Supplementary Information

**The effect of carbon nanotubes/NiFe<sub>2</sub>O<sub>4</sub> on the thermal stability,  
combustion behavior and mechanical properties of unsaturated  
polyester resin**

Xiaojuan Yu<sup>1</sup>, Dong Wang<sup>1</sup>, Bihe Yuan<sup>2</sup>, Lei Song<sup>1\*</sup> and Yuan Hu<sup>1\*</sup>

1.State Key Laboratory of Fire Science, University of Science and Technology of  
China, 96 Jinzhai Road, Hefei, Anhui 230026, P. R. China

2.School of Resources and Environmental Engineering, Wuhan University of  
Technology, Wuhan 430070, China

**Corresponding Author**

\*Tel./Fax: +86-551-63601664. E-mail: [yuanhu@ustc.edu.cn](mailto:yuanhu@ustc.edu.cn). (Yuan Hu)

\*Tel./Fax: +86-551-63600081. E-mail: [leisong@ustc.edu.cn](mailto:leisong@ustc.edu.cn). (Lei Song)

## Figure captions

**Fig. S1.** TGA curves of C@NF-3 under air conditions.

**Fig. S2.** (a) XPS survey spectra of the NiFe<sub>2</sub>O<sub>4</sub> and C@NF-1, (b) Fe 2p XPS spectra of the NiFe<sub>2</sub>O<sub>4</sub> and C@NF-1, (c) Ni 2p XPS spectra of the NiFe<sub>2</sub>O<sub>4</sub> and C@NF-1 and (d) O 1s XPS spectra of the NiFe<sub>2</sub>O<sub>4</sub> and C@NF-1.

**Fig. S3.** Raman spectra of the acid-treated MWCNTs and C@NF-1.

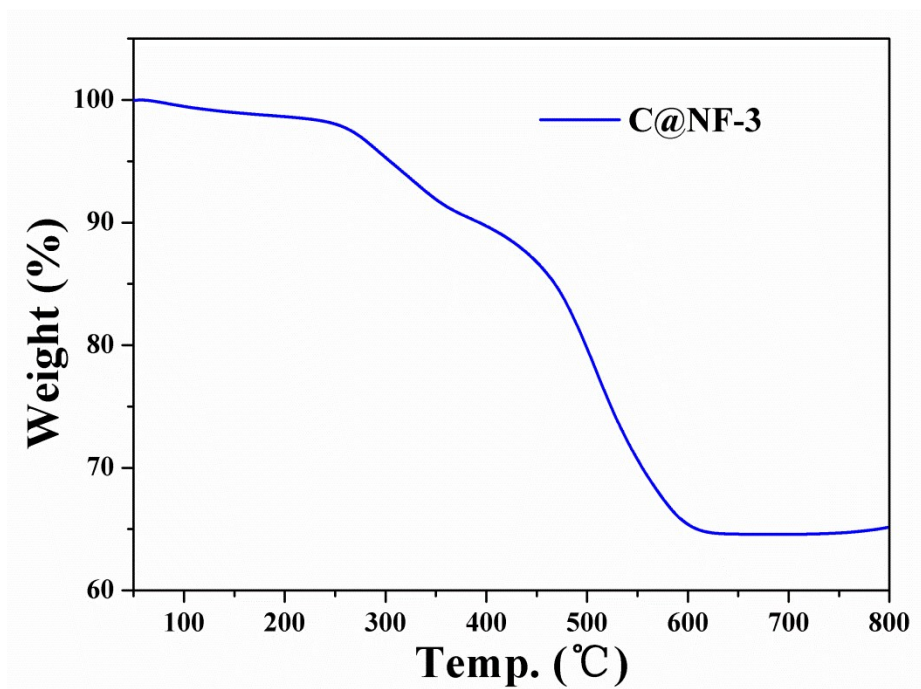

**Fig. S1.** TGA curves of C@NF-3 under air conditions.

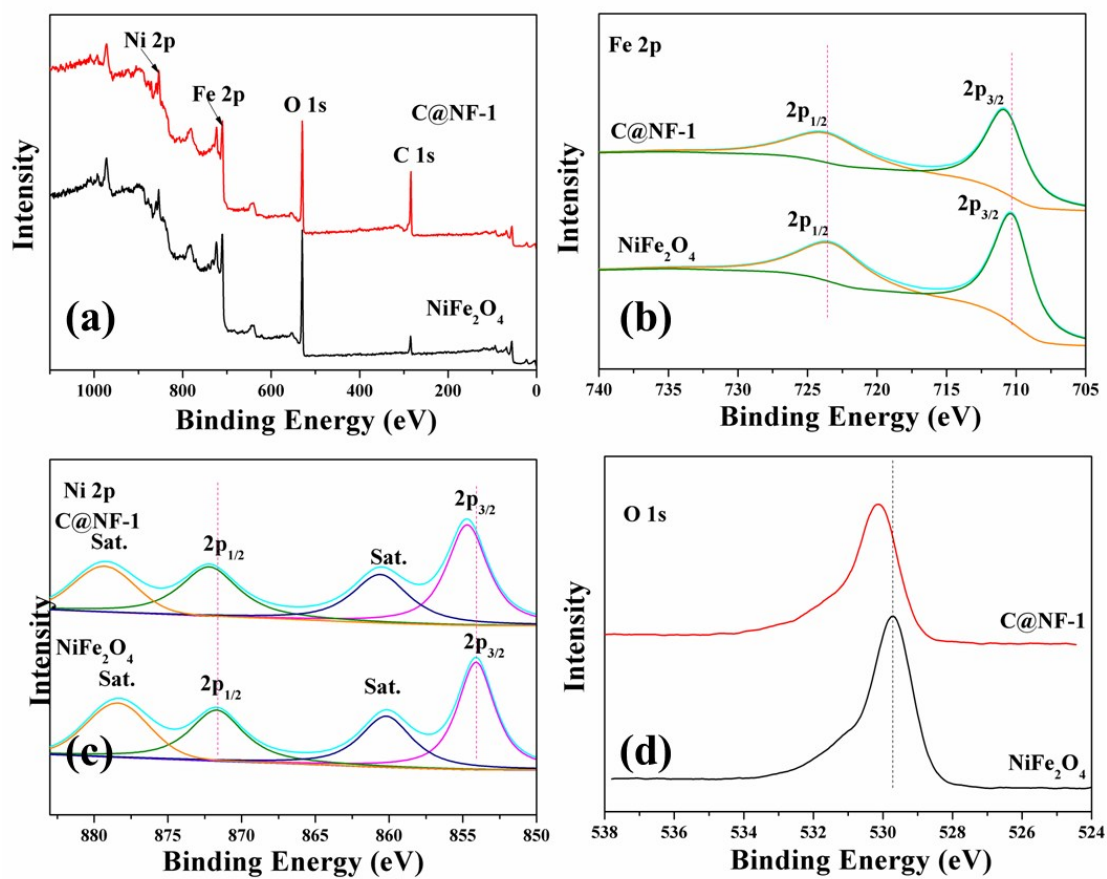

**Fig. S2.** (a) XPS survey spectra of the NiFe<sub>2</sub>O<sub>4</sub> and C@NF-1, (b) Fe 2p XPS spectra of the NiFe<sub>2</sub>O<sub>4</sub> and C@NF-1, (c) Ni 2p XPS spectra of the NiFe<sub>2</sub>O<sub>4</sub> and C@NF-1 and (d) O 1s XPS spectra of the NiFe<sub>2</sub>O<sub>4</sub> and C@NF-1.

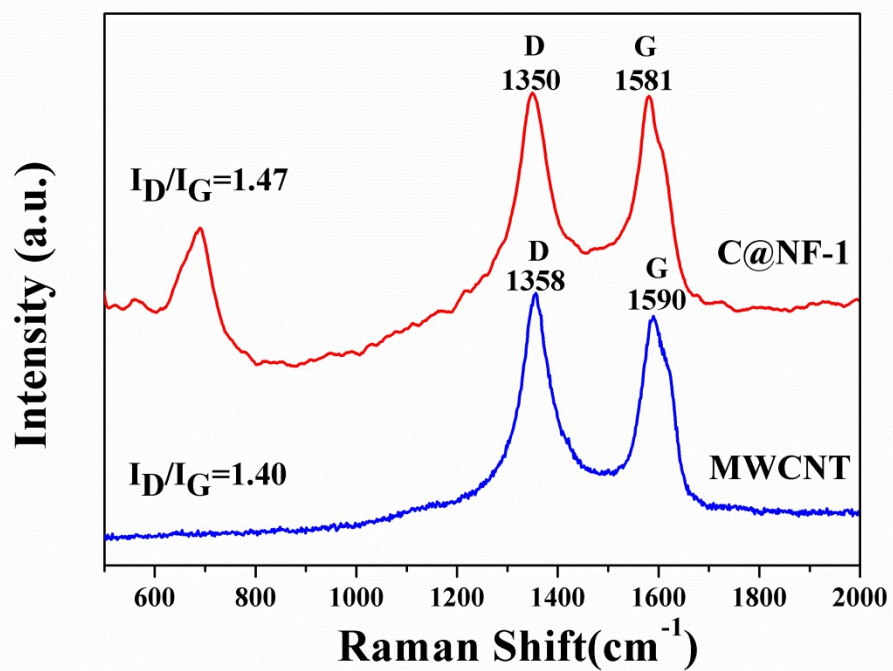

**Fig. S3.** Raman spectra of the acid-treated MWCNTs and C@NF-1.
